# Supplementary material for: Medium-sized rings: conformational preferences in cyclooctanone driven by transannular repulsive interactions
Source: Royal Society of Chemistry journal article supplement (doi:10.1039/c8cp07322h), 2019-01-01
Supplement: c8cp07322h1.pdf [file c8cp07322h1.pdf]

# **Medium-sized rings: conformational preferences in cyclooctanone driven by transannular repulsive interactions**

Ecaterina Burevschi, Isabel Peña, M. Eugenia Sanz\*

Department of Chemistry  
King's College London  
London SE1 1DB, United Kingdom

**Table S1.** Spectroscopic parameters of the conformers of cyclooctanone at the M062X/6-311++G(d,p) level of theory.

| M062X                                      | BC1          | TBC1        | BC2           | CR           | BB1          |
|--------------------------------------------|--------------|-------------|---------------|--------------|--------------|
| A (MHz)                                    | 1919         | 2019.1      | 2032          | 1936         | 1960         |
| B (MHz)                                    | 1695         | 1626.7      | 1657          | 1734         | 1626         |
| C (MHz)                                    | 1171         | 1092.9      | 1128          | 1132         | 1239         |
| $\mu_a/\mu_b/\mu_c$ (D)                    | -2.2/0.1/2.2 | 2.7/0.2/1.7 | 2.3/-0.9/-1.9 | -0.6/1.7/2.2 | -2.3/0.3/2.2 |
| $\Delta E_{M062X}$ (cm <sup>-1</sup> )     | 0            | 761         | 834           | 836          | 1209         |
| $\Delta E_{M062X+ZPC}$ (cm <sup>-1</sup> ) | 0            | 760         | 890           | 825          | 1338         |
| $\Delta G^{347}$ (cm <sup>-1</sup> )       | 0            | 631         | 818           | 756          | 1215         |

  

| M062X                                      | BC3          | TBC2          | TBC3          | BC4           | BB2          |
|--------------------------------------------|--------------|---------------|---------------|---------------|--------------|
| A (MHz)                                    | 1924         | 2138          | 2009          | 2273          | 2171         |
| B (MHz)                                    | 1681         | 1529          | 1703          | 1447          | 1526         |
| C (MHz)                                    | 1229         | 1109          | 1121          | 1014          | 1134         |
| $\mu_a/\mu_b/\mu_c$ (D)                    | -1.4/0.0/2.7 | -2.2/-0.5/2.1 | 2.0/-1.1/-1.9 | 3.4/-0.0/-0.7 | 3.2/-0.2/1.0 |
| $\Delta E_{M062X}$ (cm <sup>-1</sup> )     | 1221         | 1233          | 1389          | 1677          | 2018         |
| $\Delta E_{M062X+ZPC}$ (cm <sup>-1</sup> ) | 1232         | 1248          | 1449          | 1748          | 2213         |
| $\Delta G^{347}$ (cm <sup>-1</sup> )       | 1043         | 1171          | 1415          | 1611          | 2199         |

**Table S2.** Spectroscopic parameters of the conformers of cyclooctanone at the B3LYP-D3BJ/6-311++G(d,p) level of theory

| B3LYP-D3BJ                                      | BC1          | TBC1        | BC2           | CR           | BB1          |
|-------------------------------------------------|--------------|-------------|---------------|--------------|--------------|
| A (MHz)                                         | 1911         | 1992        | 2034          | 1869         | 1946         |
| B (MHz)                                         | 1674         | 1614        | 1624          | 1735         | 1589         |
| C (MHz)                                         | 1156         | 1083        | 1108          | 1103         | 1191         |
| $\mu_a/\mu_b/\mu_c$ (D)                         | -2.2/0.0/1.8 | 2.6/0.3/1.8 | 2.6/-0.6/-1.7 | -1.1/1.6/2.2 | -2.4/0.0/2.2 |
| $\Delta E_{B3LYP-D3BJ}$ (cm <sup>-1</sup> )     | 0            | 671         | 745           | 806          | 1056         |
| $\Delta E_{B3LYP-D3BJ+ZPC}$ (cm <sup>-1</sup> ) | 0            | 593         | 816           | 764          | 1043         |
| $\Delta G^{347}$ (cm <sup>-1</sup> )            | 0            | 395         | 792           | 548          | 800          |

  

| B3LYP-D3BJ                                      | BC3          | TBC2         | TBC3          | BC4          | BB2           |
|-------------------------------------------------|--------------|--------------|---------------|--------------|---------------|
| A (MHz)                                         | 1928         | 2094         | 1994          | 2269         | 2177          |
| B (MHz)                                         | 1638         | 1529         | 1670          | 1429         | 1487          |
| C (MHz)                                         | 1200         | 1101         | 1095          | 1004         | 1094          |
| $\mu_a/\mu_b/\mu_c$ (D)                         | 1.6/-0.0/2.6 | 2.3/-0.5/2.2 | 2.3/-0.8/-1.8 | -3.4/0.0/0.7 | 3.3/-0.2/-0.9 |
| $\Delta E_{B3LYP-D3BJ}$ (cm <sup>-1</sup> )     | 1187         | 1254         | 1427          | 1519         | 1056          |
| $\Delta E_{B3LYP-D3BJ+ZPC}$ (cm <sup>-1</sup> ) | 1196         | 1255         | 1490          | 1541         | 2104          |
| $\Delta G^{347}$ (cm <sup>-1</sup> )            | 1038         | 1150         | 1440          | 1405         | 1967          |

**Table S3.** The Cartesian coordinates of the BC1 conformation of cyclooctanone from MP2/3-611++G(d,p).

| Centre Number | Atomic Number | Coordinates (Å) |           |           |
|---------------|---------------|-----------------|-----------|-----------|
|               |               | X               | Y         | Z         |
| 1             | 6             | 1.914138        | -0.671173 | 0.247362  |
| 2             | 6             | 1.363196        | 0.613407  | 0.884117  |
| 3             | 6             | 0.909655        | 1.692423  | -0.123973 |
| 4             | 6             | -0.612096       | 1.839398  | -0.258965 |
| 5             | 6             | -1.353484       | 0.613954  | -0.825369 |
| 6             | 6             | -1.282444       | -0.575149 | 0.121540  |
| 7             | 8             | -1.963578       | -0.592684 | 1.136905  |
| 8             | 6             | 1.004208        | -1.338502 | -0.788255 |
| 9             | 6             | -0.373658       | -1.734705 | -0.246524 |
| 10            | 1             | 2.132615        | -1.393901 | 1.044772  |
| 11            | 1             | 2.872279        | -0.439521 | -0.236446 |
| 12            | 1             | 1.501739        | -2.242283 | -1.159411 |
| 13            | 1             | 0.887048        | -0.683074 | -1.658438 |
| 14            | 1             | 2.152865        | 1.023607  | 1.524227  |
| 15            | 1             | 0.535537        | 0.372161  | 1.561368  |
| 16            | 1             | -0.911075       | -2.302152 | -1.020899 |
| 17            | 1             | -0.283700       | -2.382340 | 0.632320  |
| 18            | 1             | 1.350664        | 1.495921  | -1.110898 |
| 19            | 1             | 1.302365        | 2.665938  | 0.191563  |
| 20            | 1             | -0.831144       | 2.696886  | -0.906473 |
| 21            | 1             | -1.038304       | 2.065674  | 0.726461  |
| 22            | 1             | -2.414640       | 0.866111  | -0.925785 |
| 23            | 1             | -0.964714       | 0.360523  | -1.817206 |

**Table S4.** The Cartesian coordinates of the TBC1 conformation of cyclooctanone from MP2/3-611++G(d,p).

| Centre Number | Atomic Number | Coordinates (Å) |           |           |
|---------------|---------------|-----------------|-----------|-----------|
|               |               | X               | Y         | Z         |
| 1             | 6             | -1.936974       | -0.609817 | -0.295601 |
| 2             | 6             | -1.776039       | 0.895290  | -0.018096 |
| 3             | 6             | -0.539669       | 1.575635  | -0.640141 |
| 4             | 6             | 0.630595        | 1.809902  | 0.322224  |
| 5             | 6             | 1.122383        | 0.528336  | 1.017263  |
| 6             | 6             | 1.332414        | -0.544126 | -0.034989 |
| 7             | 8             | 2.239706        | -0.438340 | -0.847771 |
| 8             | 6             | -1.024924       | -1.578523 | 0.472250  |
| 9             | 6             | 0.402806        | -1.746084 | -0.063223 |
| 10            | 1             | -1.825338       | -0.786467 | -1.374736 |
| 11            | 1             | -2.971716       | -0.877839 | -0.047462 |
| 12            | 1             | -1.488021       | -2.572218 | 0.434061  |
| 13            | 1             | -1.008809       | -1.300276 | 1.533182  |
| 14            | 1             | -1.795148       | 1.069110  | 1.067441  |
| 15            | 1             | -2.672868       | 1.384846  | -0.415353 |
| 16            | 1             | 0.390014        | -2.117473 | -1.094162 |
| 17            | 1             | 0.912586        | -2.515077 | 0.537035  |
| 18            | 1             | -0.830531       | 2.550205  | -1.048920 |
| 19            | 1             | -0.192248       | 0.984647  | -1.498167 |
| 20            | 1             | 1.468300        | 2.237788  | -0.239161 |

|    |   |          |          |          |
|----|---|----------|----------|----------|
| 21 | 1 | 0.338285 | 2.540855 | 1.086048 |
| 22 | 1 | 0.410353 | 0.203811 | 1.779888 |
| 23 | 1 | 2.083949 | 0.721137 | 1.504358 |

**Table S5.** The Cartesian coordinates of the BC2 conformation of cyclooctanone from MP2/3-611++G(d,p).

| Centre Number | Atomic Number | Coordinates (Å) |           |           |
|---------------|---------------|-----------------|-----------|-----------|
|               |               | X               | Y         | Z         |
| 1             | 6             | -1.622623       | 0.926737  | 0.476356  |
| 2             | 6             | -2.021822       | -0.406989 | -0.184864 |
| 3             | 6             | -0.901502       | -1.283734 | -0.756777 |
| 4             | 6             | 0.086369        | -1.887084 | 0.246981  |
| 5             | 6             | 0.933926        | -0.852849 | 1.014120  |
| 6             | 6             | 1.443699        | 0.216797  | 0.059894  |
| 7             | 8             | 2.263118        | -0.067090 | -0.802551 |
| 8             | 6             | -0.583248       | 1.757824  | -0.301179 |
| 9             | 6             | 0.876016        | 1.617248  | 0.184984  |
| 10            | 1             | -1.268301       | 0.761742  | 1.499399  |
| 11            | 1             | -2.539796       | 1.518502  | 0.579401  |
| 12            | 1             | -0.632094       | 1.519282  | -1.371001 |
| 13            | 1             | -0.836581       | 2.820188  | -0.214919 |
| 14            | 1             | -2.701428       | -0.171447 | -1.014442 |
| 15            | 1             | -2.608108       | -0.995445 | 0.533761  |
| 16            | 1             | 0.919413        | 1.918885  | 1.240054  |
| 17            | 1             | 1.519992        | 2.283898  | -0.396252 |
| 18            | 1             | -0.341712       | -0.722027 | -1.515208 |
| 19            | 1             | -1.374822       | -2.112073 | -1.298538 |
| 20            | 1             | -0.451062       | -2.515612 | 0.967968  |
| 21            | 1             | 0.771016        | -2.539632 | -0.305576 |
| 22            | 1             | 0.366092        | -0.404344 | 1.831741  |
| 23            | 1             | 1.807559        | -1.352898 | 1.446922  |

**Table S6.** The Cartesian coordinates of the CR1 conformation of cyclooctanone from MP2/3-611++G(d,p).

| Centre Number | Atomic Number | Coordinates (Å) |           |           |
|---------------|---------------|-----------------|-----------|-----------|
|               |               | X               | Y         | Z         |
| 1             | 6             | 0.418147        | 1.781228  | -0.291395 |
| 2             | 6             | -0.772816       | 1.439698  | 0.645252  |
| 3             | 6             | -1.963985       | 0.720212  | -0.012591 |
| 4             | 6             | -1.843050       | -0.804735 | -0.105084 |
| 5             | 6             | -0.586049       | -1.286459 | -0.840640 |
| 6             | 6             | 0.660088        | -1.188314 | 0.032341  |
| 7             | 8             | 0.691694        | -1.733935 | 1.126204  |
| 8             | 6             | 1.741472        | 1.074243  | 0.040353  |
| 9             | 6             | 1.833745        | -0.375909 | -0.472395 |
| 10            | 1             | 0.147478        | 1.573961  | -1.335527 |
| 11            | 1             | 0.597692        | 2.860887  | -0.241958 |
| 12            | 1             | 1.887892        | 1.072641  | 1.127476  |
| 13            | 1             | 2.576709        | 1.636216  | -0.393779 |
| 14            | 1             | -0.420480       | 0.846218  | 1.499068  |
| 15            | 1             | -1.146153       | 2.377911  | 1.070085  |

|    |   |           |           |           |
|----|---|-----------|-----------|-----------|
| 16 | 1 | 1.848484  | -0.373675 | -1.568137 |
| 17 | 1 | 2.754732  | -0.837019 | -0.102587 |
| 18 | 1 | -2.122897 | 1.137153  | -1.016824 |
| 19 | 1 | -2.872168 | 0.944964  | 0.560260  |
| 20 | 1 | -1.834148 | -1.238445 | 0.901769  |
| 21 | 1 | -2.729734 | -1.197278 | -0.616542 |
| 22 | 1 | -0.694115 | -2.350599 | -1.087262 |
| 23 | 1 | -0.452151 | -0.741232 | -1.780730 |

**Table S7.** The Cartesian coordinates of the BC3 conformation of cyclooctanone from MP2/3-611++G(d,p).

| Centre Number | Atomic Number | Coordinates (Å) |           |           |
|---------------|---------------|-----------------|-----------|-----------|
|               |               | X               | Y         | Z         |
| 1             | 6             | -1.226498       | 1.322404  | 0.395956  |
| 2             | 6             | -2.006792       | -0.000048 | 0.313970  |
| 3             | 6             | -1.226436       | -1.322464 | 0.395939  |
| 4             | 6             | -0.286949       | -1.609215 | -0.793445 |
| 5             | 6             | 1.200490        | -1.303362 | -0.505047 |
| 6             | 6             | 1.394069        | 0.000029  | 0.241910  |
| 7             | 8             | 1.651681        | 0.000065  | 1.439890  |
| 8             | 6             | -0.287038       | 1.609219  | -0.793433 |
| 9             | 6             | 1.200422        | 1.303380  | -0.505103 |
| 10            | 1             | -0.660811       | 1.360852  | 1.335534  |
| 11            | 1             | -1.970839       | 2.125230  | 0.453311  |
| 12            | 1             | -0.624726       | 1.054604  | -1.674795 |
| 13            | 1             | -0.346423       | 2.669026  | -1.064470 |
| 14            | 1             | -2.588453       | -0.000054 | -0.619180 |
| 15            | 1             | -2.739057       | -0.000071 | 1.131479  |
| 16            | 1             | 1.761512        | 1.279359  | -1.447252 |
| 17            | 1             | 1.614240        | 2.092547  | 0.129676  |
| 18            | 1             | -0.660754       | -1.360898 | 1.335520  |
| 19            | 1             | -1.970738       | -2.125327 | 0.453279  |
| 20            | 1             | -0.624616       | -1.054563 | -1.674792 |
| 21            | 1             | -0.346311       | -2.669010 | -1.064534 |
| 22            | 1             | 1.761636        | -1.279374 | -1.447164 |
| 23            | 1             | 1.614277        | -2.092496 | 0.129792  |

**Table S8.** The Cartesian coordinates of the TBC2 conformation of cyclooctanone from MP2/3-611++G(d,p).

| Centre Number | Atomic Number | Coordinates (Å) |           |           |
|---------------|---------------|-----------------|-----------|-----------|
|               |               | X               | Y         | Z         |
| 1             | 6             | -0.820598       | 1.351934  | 0.650592  |
| 2             | 6             | -2.047779       | 0.448776  | 0.463833  |
| 3             | 6             | -1.820336       | -0.846439 | -0.333021 |
| 4             | 6             | -0.607824       | -1.705819 | 0.064861  |
| 5             | 6             | 0.722993        | -1.351454 | -0.644322 |
| 6             | 6             | 1.503848        | -0.243597 | 0.044154  |
| 7             | 8             | 2.140412        | -0.487233 | 1.059811  |
| 8             | 6             | -0.032406       | 1.620584  | -0.649901 |
| 9             | 6             | 1.430226        | 1.155959  | -0.533965 |
| 10            | 1             | -1.149713       | 2.295898  | 1.099332  |

|    |   |           |           |           |
|----|---|-----------|-----------|-----------|
| 11 | 1 | -0.155886 | 0.894348  | 1.393637  |
| 12 | 1 | -0.042349 | 2.686187  | -0.900652 |
| 13 | 1 | -0.509896 | 1.108678  | -1.492149 |
| 14 | 1 | -2.435877 | 0.187821  | 1.456718  |
| 15 | 1 | -2.841608 | 1.016457  | -0.039538 |
| 16 | 1 | 1.911930  | 1.159551  | -1.520884 |
| 17 | 1 | 1.996298  | 1.814806  | 0.131566  |
| 18 | 1 | -2.726602 | -1.454264 | -0.221177 |
| 19 | 1 | -1.749968 | -0.623619 | -1.405184 |
| 20 | 1 | -0.835503 | -2.745289 | -0.195926 |
| 21 | 1 | -0.452432 | -1.687521 | 1.151313  |
| 22 | 1 | 1.374262  | -2.231322 | -0.615034 |
| 23 | 1 | 0.525312  | -1.103533 | -1.693896 |

**Table S9.** The Cartesian coordinates of the BB1 conformation of cyclooctanone from MP2/3-611++G(d,p).

| Centre Number | Atomic Number | Coordinates (Å) |           |           |
|---------------|---------------|-----------------|-----------|-----------|
|               |               | X               | Y         | Z         |
| 1             | 6             | 1.187934        | -1.483624 | 0.400241  |
| 2             | 6             | 1.338656        | -0.100552 | 1.055104  |
| 3             | 6             | 1.669909        | 1.071611  | 0.118495  |
| 4             | 6             | 0.548988        | 1.527840  | -0.840057 |
| 5             | 6             | -0.854471       | 1.489826  | -0.228183 |
| 6             | 6             | -1.406052       | 0.119502  | 0.149010  |
| 7             | 8             | -2.142605       | 0.002509  | 1.118971  |
| 8             | 6             | 0.352130        | -1.531527 | -0.883873 |
| 9             | 6             | -1.119049       | -1.085451 | -0.739237 |
| 10            | 1             | 2.187204        | -1.867073 | 0.155899  |
| 11            | 1             | 0.761819        | -2.174335 | 1.139877  |
| 12            | 1             | 0.339638        | -2.565526 | -1.249256 |
| 13            | 1             | 0.857927        | -0.952633 | -1.659500 |
| 14            | 1             | 2.144120        | -0.173501 | 1.796705  |
| 15            | 1             | 0.443278        | 0.144223  | 1.634911  |
| 16            | 1             | -1.712065       | -1.902756 | -0.317147 |
| 17            | 1             | -1.521043       | -0.865203 | -1.738471 |
| 18            | 1             | 1.933885        | 1.926225  | 0.754580  |
| 19            | 1             | 2.569509        | 0.836294  | -0.466172 |
| 20            | 1             | 0.757514        | 2.560976  | -1.142701 |
| 21            | 1             | 0.555790        | 0.946851  | -1.765305 |
| 22            | 1             | -0.915662       | 2.115017  | 0.669304  |
| 23            | 1             | -1.569348       | 1.905634  | -0.953497 |

**Table S10.** The Cartesian coordinates of the TBC3 conformation of cyclooctanone from MP2/3-611++G(d,p).

| Centre Number | Atomic Number | Coordinates (Å) |           |           |
|---------------|---------------|-----------------|-----------|-----------|
|               |               | X               | Y         | Z         |
| 1             | 6             | -0.234723       | 1.543215  | -0.689230 |
| 2             | 6             | -1.334262       | 1.210654  | 0.341714  |
| 3             | 6             | -2.157864       | -0.041159 | 0.005061  |
| 4             | 6             | -1.343120       | -1.300466 | -0.337084 |

|    |   |           |           |           |
|----|---|-----------|-----------|-----------|
| 5  | 6 | -0.145312 | -1.579925 | 0.598612  |
| 6  | 6 | 1.114909  | -0.860672 | 0.126605  |
| 7  | 8 | 1.741995  | -1.297226 | -0.828682 |
| 8  | 6 | 1.171463  | 1.643364  | -0.078776 |
| 9  | 6 | 1.544544  | 0.429835  | 0.802624  |
| 10 | 1 | -0.214169 | 0.775941  | -1.472124 |
| 11 | 1 | -0.463156 | 2.483574  | -1.202753 |
| 12 | 1 | 1.254466  | 2.551667  | 0.530580  |
| 13 | 1 | 1.904255  | 1.725102  | -0.888738 |
| 14 | 1 | -0.885246 | 1.074647  | 1.332148  |
| 15 | 1 | -2.021183 | 2.057574  | 0.450318  |
| 16 | 1 | 1.086649  | 0.512077  | 1.791765  |
| 17 | 1 | 2.631330  | 0.398801  | 0.930754  |
| 18 | 1 | -2.809811 | -0.263121 | 0.859857  |
| 19 | 1 | -2.820649 | 0.174933  | -0.842978 |
| 20 | 1 | -2.021561 | -2.160212 | -0.303314 |
| 21 | 1 | -0.965855 | -1.257117 | -1.364923 |
| 22 | 1 | -0.392981 | -1.316190 | 1.632764  |
| 23 | 1 | 0.088147  | -2.648940 | 0.558945  |

**Table S11.** The Cartesian coordinates of the BC4 conformation of cyclooctanone from MP2/3-611++G(d,p).

| Centre Number | Atomic Number | Coordinates (Å) |           |           |
|---------------|---------------|-----------------|-----------|-----------|
|               |               | X               | Y         | Z         |
| 1             | 6             | 1.642047        | -1.306596 | -0.148751 |
| 2             | 6             | 1.872993        | -0.000001 | 0.615788  |
| 3             | 6             | 1.642049        | 1.306595  | -0.148750 |
| 4             | 6             | 0.203200        | 1.601502  | -0.604175 |
| 5             | 6             | -0.885502       | 1.318559  | 0.463063  |
| 6             | 6             | -1.601298       | 0.000001  | 0.217177  |
| 7             | 8             | -2.735782       | 0.000002  | -0.244183 |
| 8             | 6             | 0.203197        | -1.601503 | -0.604174 |
| 9             | 6             | -0.885504       | -1.318559 | 0.463063  |
| 10            | 1             | 1.961680        | -2.128295 | 0.505860  |
| 11            | 1             | 2.303678        | -1.335083 | -1.024723 |
| 12            | 1             | 0.150361        | -2.661075 | -0.877003 |
| 13            | 1             | -0.033819       | -1.053029 | -1.521208 |
| 14            | 1             | 2.913792        | -0.000002 | 0.963748  |
| 15            | 1             | 1.264822        | -0.000001 | 1.528595  |
| 16            | 1             | -1.658591       | -2.090007 | 0.421357  |
| 17            | 1             | -0.443040       | -1.333346 | 1.466556  |
| 18            | 1             | 1.961680        | 2.128293  | 0.505863  |
| 19            | 1             | 2.303682        | 1.335083  | -1.024721 |
| 20            | 1             | -0.033815       | 1.053026  | -1.521208 |
| 21            | 1             | 0.150364        | 2.661073  | -0.877005 |
| 22            | 1             | -1.658587       | 2.090009  | 0.421357  |
| 23            | 1             | -0.443037       | 1.333346  | 1.466555  |

**Table S12.** The Cartesian coordinates of the BB2 conformation of cyclooctanone from MP2/3-611++G(d,p).

| Centre Number | Atomic Number | Coordinates (Å) |  |  |
|---------------|---------------|-----------------|--|--|
|---------------|---------------|-----------------|--|--|

|    |   | X         | Y         | Z         |
|----|---|-----------|-----------|-----------|
| 1  | 6 | -1.719556 | 0.682518  | 0.578090  |
| 2  | 6 | -1.957751 | -0.345485 | -0.534528 |
| 3  | 6 | -0.799700 | -1.321618 | -0.826801 |
| 4  | 6 | 0.025274  | -1.782091 | 0.385854  |
| 5  | 6 | 0.950615  | -0.716524 | 1.034900  |
| 6  | 6 | 1.483980  | 0.252976  | -0.000617 |
| 7  | 8 | 2.597307  | 0.110740  | -0.485733 |
| 8  | 6 | -0.663907 | 1.773604  | 0.308708  |
| 9  | 6 | 0.593569  | 1.395142  | -0.487862 |
| 10 | 1 | -2.670777 | 1.191555  | 0.777663  |
| 11 | 1 | -1.488273 | 0.141336  | 1.500178  |
| 12 | 1 | -1.146768 | 2.580976  | -0.255964 |
| 13 | 1 | -0.367116 | 2.217101  | 1.267843  |
| 14 | 1 | -2.832869 | -0.937579 | -0.237248 |
| 15 | 1 | -2.239991 | 0.167676  | -1.463687 |
| 16 | 1 | 1.248988  | 2.270911  | -0.565324 |
| 17 | 1 | 0.319660  | 1.149689  | -1.521132 |
| 18 | 1 | -1.226857 | -2.217039 | -1.294621 |
| 19 | 1 | -0.118060 | -0.907025 | -1.576243 |
| 20 | 1 | 0.667570  | -2.602553 | 0.046689  |
| 21 | 1 | -0.637605 | -2.198410 | 1.154748  |
| 22 | 1 | 1.810896  | -1.214321 | 1.491033  |
| 23 | 1 | 0.427603  | -0.159371 | 1.815454  |

**Table S13.** Measured frequencies and residuals (in MHz) for the rotational transitions of the parent species of cyclooctanone BC1.

| J' | K' <sub>-1</sub> | K' <sub>+1</sub> | J'' | K'' <sub>-1</sub> | K'' <sub>+1</sub> | V <sub>obs</sub> | V <sub>obs</sub> - V <sub>calc</sub> |
|----|------------------|------------------|-----|-------------------|-------------------|------------------|--------------------------------------|
| 4  | 4                | 1                | 4   | 3                 | 1                 | 2197.7575        | 0.0010                               |
| 5  | 3                | 2                | 5   | 3                 | 3                 | 2199.6797        | 0.0003                               |
| 6  | 5                | 2                | 6   | 4                 | 2                 | 2283.9775        | 0.0059                               |
| 2  | 2                | 0                | 2   | 1                 | 2                 | 2595.0648        | 0.0194                               |
| 4  | 2                | 2                | 4   | 2                 | 3                 | 2628.2886        | 0.0003                               |
| 3  | 3                | 0                | 3   | 2                 | 2                 | 2809.7264        | -0.0026                              |
| 1  | 0                | 1                | 0   | 0                 | 0                 | 2845.3742        | -0.0015                              |
| 3  | 1                | 2                | 3   | 1                 | 3                 | 2928.8730        | 0.0033                               |
| 1  | 1                | 1                | 0   | 0                 | 0                 | 3071.9416        | 0.0031                               |
| 5  | 5                | 1                | 5   | 4                 | 1                 | 3149.7381        | -0.0013                              |
| 4  | 4                | 0                | 4   | 3                 | 2                 | 3206.0952        | -0.0034                              |
| 7  | 4                | 3                | 7   | 4                 | 4                 | 3289.0077        | 0.0024                               |
| 7  | 6                | 2                | 7   | 5                 | 2                 | 3312.1505        | -0.0013                              |
| 4  | 3                | 2                | 4   | 1                 | 3                 | 3412.1423        | 0.0014                               |
| 1  | 1                | 0                | 0   | 0                 | 0                 | 3592.5791        | -0.0049                              |
| 5  | 5                | 0                | 5   | 4                 | 2                 | 3766.7681        | -0.0017                              |
| 6  | 3                | 3                | 6   | 3                 | 4                 | 3788.8203        | 0.0006                               |
| 6  | 6                | 1                | 6   | 5                 | 1                 | 4115.2158        | -0.0024                              |
| 5  | 2                | 3                | 5   | 2                 | 4                 | 4118.1711        | -0.0008                              |
| 5  | 4                | 1                | 5   | 3                 | 3                 | 4175.7158        | 0.0001                               |

|   |   |   |   |   |   |           |         |
|---|---|---|---|---|---|-----------|---------|
| 4 | 1 | 3 | 4 | 1 | 4 | 4288.8620 | -0.0015 |
| 6 | 5 | 1 | 6 | 4 | 3 | 4292.2434 | -0.0015 |
| 5 | 3 | 3 | 5 | 1 | 4 | 4379.1883 | 0.0010  |
| 8 | 7 | 2 | 8 | 6 | 2 | 4388.7380 | 0.0010  |
| 6 | 6 | 0 | 6 | 5 | 2 | 4445.5722 | 0.0001  |
| 2 | 0 | 2 | 1 | 1 | 0 | 4590.1200 | 0.0050  |
| 7 | 6 | 1 | 7 | 5 | 3 | 4637.1492 | -0.0003 |
| 8 | 4 | 4 | 8 | 4 | 5 | 5000.3328 | -0.0017 |
| 7 | 7 | 1 | 7 | 6 | 1 | 5040.7774 | 0.0032  |
| 2 | 0 | 2 | 1 | 1 | 1 | 5110.7477 | -0.0128 |
| 2 | 1 | 2 | 1 | 1 | 1 | 5170.1082 | 0.0052  |
| 8 | 7 | 1 | 8 | 6 | 3 | 5174.6072 | 0.0034  |
| 7 | 7 | 0 | 7 | 6 | 2 | 5197.9806 | -0.0042 |
| 7 | 3 | 4 | 7 | 3 | 5 | 5319.8702 | 0.0006  |
| 3 | 1 | 3 | 2 | 2 | 1 | 5333.1963 | -0.0054 |
| 2 | 0 | 2 | 1 | 0 | 1 | 5337.3236 | 0.0004  |
| 2 | 1 | 2 | 1 | 0 | 1 | 5396.6701 | 0.0043  |
| 9 | 8 | 2 | 9 | 7 | 2 | 5428.9533 | -0.0002 |
| 6 | 2 | 4 | 6 | 2 | 5 | 5490.0626 | -0.0018 |
| 6 | 3 | 4 | 6 | 1 | 5 | 5551.2456 | 0.0010  |
| 8 | 6 | 2 | 8 | 5 | 4 | 5568.9579 | 0.0008  |
| 5 | 1 | 4 | 5 | 1 | 5 | 5572.1771 | -0.0001 |
| 9 | 7 | 2 | 9 | 6 | 4 | 5640.8480 | 0.0011  |
| 7 | 5 | 2 | 7 | 4 | 4 | 5754.0101 | -0.0013 |
| 9 | 8 | 1 | 9 | 7 | 3 | 5846.0310 | -0.0054 |
| 8 | 8 | 1 | 8 | 7 | 1 | 5922.5425 | -0.0074 |
| 8 | 8 | 0 | 8 | 7 | 2 | 5991.1218 | 0.0000  |
| 3 | 0 | 3 | 2 | 1 | 1 | 6002.7627 | -0.0033 |
| 6 | 4 | 2 | 6 | 3 | 4 | 6122.0547 | -0.0040 |
| 2 | 1 | 1 | 1 | 1 | 0 | 6211.3935 | 0.0019  |
| 9 | 4 | 5 | 9 | 4 | 6 | 6521.4145 | -0.0026 |
| 8 | 3 | 5 | 8 | 3 | 6 | 6685.6046 | -0.0014 |
| 4 | 1 | 4 | 3 | 2 | 2 | 6716.2328 | 0.0007  |
| 9 | 9 | 1 | 9 | 8 | 1 | 6776.1366 | 0.0076  |
| 7 | 2 | 5 | 7 | 2 | 6 | 6776.8091 | -0.0036 |
| 7 | 3 | 5 | 7 | 1 | 6 | 6788.3516 | -0.0008 |
| 6 | 1 | 5 | 6 | 1 | 6 | 6828.8018 | 0.0000  |
| 2 | 2 | 1 | 1 | 1 | 0 | 6891.0769 | -0.0038 |
| 2 | 1 | 1 | 1 | 0 | 1 | 6958.6001 | 0.0002  |
| 4 | 0 | 4 | 3 | 1 | 2 | 6988.8503 | -0.0009 |
| 2 | 2 | 0 | 1 | 1 | 0 | 7244.5029 | 0.0001  |
| 2 | 2 | 1 | 1 | 1 | 1 | 7411.7277 | 0.0014  |
| 3 | 0 | 3 | 2 | 1 | 2 | 7564.7025 | 0.0024  |
| 3 | 1 | 3 | 2 | 1 | 2 | 7574.8279 | 0.0029  |
| 3 | 0 | 3 | 2 | 0 | 2 | 7624.0441 | 0.0015  |
| 3 | 1 | 3 | 2 | 0 | 2 | 7634.1697 | 0.0022  |

|    |   |   |    |   |   |           |         |
|----|---|---|----|---|---|-----------|---------|
| 10 | 4 | 6 | 10 | 4 | 7 | 7875.4128 | 0.0059  |
| 5  | 1 | 5 | 4  | 2 | 3 | 7890.3753 | 0.0011  |
| 5  | 0 | 5 | 4  | 1 | 3 | 7958.0775 | -0.0011 |

**Table S14.** Measured frequencies and residuals (in MHz) for the rotational transitions of the  $^{13}\text{C}_1$  isotopologue of cyclooctanone BC1.

| J' | K'_{-1} | K'_{+1} | J'' | K''_{-1} | K''_{+1} | V <sub>obs</sub> | V <sub>obs</sub> - V <sub>calc</sub> |
|----|---------|---------|-----|----------|----------|------------------|--------------------------------------|
| 1  | 0       | 1       | 0   | 0        | 0        | 2814.2090        | -0.0062                              |
| 1  | 1       | 0       | 0   | 0        | 0        | 3566.8421        | -0.0008                              |
| 2  | 1       | 2       | 1   | 1        | 1        | 5116.3318        | 0.0016                               |
| 2  | 0       | 2       | 1   | 0        | 1        | 5290.0114        | 0.0034                               |
| 2  | 1       | 1       | 1   | 1        | 0        | 6140.5224        | 0.0004                               |
| 2  | 1       | 1       | 1   | 0        | 1        | 6893.1520        | 0.0023                               |
| 2  | 2       | 0       | 1   | 1        | 0        | 7200.5290        | -0.0015                              |
| 3  | 1       | 3       | 2   | 1        | 2        | 7501.4046        | -0.0046                              |
| 3  | 0       | 3       | 2   | 0        | 2        | 7556.0982        | 0.0028                               |

**Table S15.** Measured frequencies and residuals (in MHz) for the rotational transitions of the  $^{13}\text{C}_2$  isotopologue of cyclooctanone BC1.

| J' | K'_{-1} | K'_{+1} | J'' | K''_{-1} | K''_{+1} | V <sub>obs</sub> | V <sub>obs</sub> - V <sub>calc</sub> |
|----|---------|---------|-----|----------|----------|------------------|--------------------------------------|
| 1  | 0       | 1       | 0   | 0        | 0        | 2822.6069        | -0.0001                              |
| 1  | 1       | 0       | 0   | 0        | 0        | 3569.0798        | -0.0034                              |
| 2  | 1       | 2       | 1   | 1        | 1        | 5134.8736        | 0.0002                               |
| 2  | 0       | 2       | 1   | 0        | 1        | 5306.1333        | -0.0004                              |
| 2  | 1       | 1       | 1   | 1        | 0        | 6155.5451        | -0.0008                              |
| 2  | 1       | 1       | 1   | 0        | 1        | 6902.0236        | 0.0016                               |
| 2  | 2       | 0       | 1   | 1        | 0        | 7203.0375        | 0.0008                               |
| 3  | 1       | 3       | 2   | 1        | 2        | 7528.9720        | 0.0004                               |
| 3  | 0       | 3       | 2   | 0        | 2        | 7582.1907        | -0.0001                              |

**Table S16.** Measured frequencies and residuals (in MHz) for the rotational transitions of the  $^{13}\text{C}_3$  isotopologue of cyclooctanone BC1.

| J' | K'_{-1} | K'_{+1} | J'' | K''_{-1} | K''_{+1} | V <sub>obs</sub> | V <sub>obs</sub> - V <sub>calc</sub> |
|----|---------|---------|-----|----------|----------|------------------|--------------------------------------|
| 1  | 0       | 1       | 0   | 0        | 0        | 2826.7172        | -0.0058                              |
| 1  | 1       | 0       | 0   | 0        | 0        | 3567.2742        | -0.0038                              |
| 2  | 1       | 2       | 1   | 1        | 1        | 5130.9911        | 0.0000                               |
| 2  | 0       | 2       | 1   | 0        | 1        | 5293.8069        | -0.0007                              |
| 2  | 1       | 1       | 1   | 1        | 0        | 6175.8914        | -0.0006                              |
| 2  | 1       | 1       | 1   | 0        | 1        | 6916.4509        | 0.0039                               |
| 2  | 2       | 0       | 1   | 1        | 0        | 7189.8336        | -0.0013                              |
| 2  | 2       | 1       | 1   | 1        | 1        | 7352.6555        | 0.0009                               |
| 3  | 1       | 3       | 2   | 1        | 2        | 7513.2113        | 0.0010                               |

|   |   |   |   |   |   |           |        |
|---|---|---|---|---|---|-----------|--------|
| 3 | 0 | 3 | 2 | 0 | 2 | 7559.3924 | 0.0007 |
|---|---|---|---|---|---|-----------|--------|

**Table S17.** Measured frequencies and residuals (in MHz) for the rotational transitions of the  $^{13}\text{C}_4$  isotopologue of cyclooctanone BC1.

| J' | K'_{-1} | K'_{+1} | J'' | K''_{-1} | K''_{+1} | V <sub>obs</sub> | V <sub>obs</sub> - V <sub>calc</sub> |
|----|---------|---------|-----|----------|----------|------------------|--------------------------------------|
| 1  | 0       | 1       | 0   | 0        | 0        | 2834.5673        | -0.0085                              |
| 1  | 1       | 0       | 0   | 0        | 0        | 3565.1608        | -0.0064                              |
| 2  | 1       | 2       | 1   | 1        | 1        | 5139.4307        | 0.0013                               |
| 2  | 0       | 2       | 1   | 0        | 1        | 5293.1576        | -0.0005                              |
| 2  | 1       | 1       | 1   | 1        | 0        | 6198.8651        | 0.0001                               |
| 2  | 1       | 1       | 1   | 0        | 1        | 6929.4604        | 0.0040                               |
| 2  | 2       | 0       | 1   | 1        | 0        | 7177.4700        | -0.0002                              |
| 2  | 2       | 1       | 1   | 1        | 1        | 7331.2031        | 0.0010                               |
| 3  | 1       | 3       | 2   | 1        | 2        | 7518.0276        | 0.0014                               |
| 3  | 0       | 3       | 2   | 0        | 2        | 7558.0205        | -0.0002                              |

**Table S18.** Measured frequencies and residuals (in MHz) for the rotational transitions of the  $^{13}\text{C}_5$  isotopologue of cyclooctanone BC1.

| J' | K'_{-1} | K'_{+1} | J'' | K''_{-1} | K''_{+1} | V <sub>obs</sub> | V <sub>obs</sub> - V <sub>calc</sub> |
|----|---------|---------|-----|----------|----------|------------------|--------------------------------------|
| 1  | 0       | 1       | 0   | 0        | 0        | 2827.9108        | -0.0092                              |
| 1  | 1       | 0       | 0   | 0        | 0        | 3570.5360        | -0.0018                              |
| 2  | 1       | 2       | 1   | 1        | 1        | 5141.8547        | 0.0021                               |
| 2  | 0       | 2       | 1   | 0        | 1        | 5309.5621        | -0.0006                              |
| 2  | 1       | 1       | 1   | 1        | 0        | 6169.8180        | -0.0007                              |
| 2  | 1       | 1       | 1   | 0        | 1        | 6912.4403        | 0.0038                               |
| 2  | 2       | 0       | 1   | 1        | 0        | 7201.9901        | -0.0010                              |
| 2  | 2       | 1       | 1   | 1        | 1        | 7369.7046        | 0.0002                               |
| 3  | 1       | 3       | 2   | 1        | 2        | 7535.9815        | 0.0014                               |
| 3  | 0       | 3       | 2   | 0        | 2        | 7586.3131        | -0.0003                              |

**Table S19.** Measured frequencies and residuals (in MHz) for the rotational transitions of the  $^{13}\text{C}_6$  isotopologue of cyclooctanone BC1.

| J' | K'_{-1} | K'_{+1} | J'' | K''_{-1} | K''_{+1} | V <sub>obs</sub> | V <sub>obs</sub> - V <sub>calc</sub> |
|----|---------|---------|-----|----------|----------|------------------|--------------------------------------|
| 1  | 0       | 1       | 0   | 0        | 0        | 2831.0670        | -0.0020                              |
| 2  | 1       | 2       | 1   | 1        | 1        | 5146.0876        | 0.0003                               |
| 2  | 0       | 2       | 1   | 0        | 1        | 5317.3364        | 0.0000                               |
| 2  | 1       | 1       | 1   | 1        | 0        | 6178.1788        | -0.0009                              |
| 3  | 0       | 3       | 2   | 0        | 2        | 7595.4359        | -0.0011                              |
| 3  | 1       | 3       | 2   | 1        | 2        | 7542.9578        | 0.0015                               |
| 1  | 1       | 0       | 0   | 0        | 0        | 3582.1519        | -0.0071                              |
| 2  | 1       | 1       | 1   | 0        | 1        | 6929.2728        | 0.0031                               |
| 2  | 2       | 1       | 1   | 1        | 1        | 7399.3569        | 0.0012                               |

|   |   |   |   |   |   |           |        |
|---|---|---|---|---|---|-----------|--------|
| 2 | 2 | 0 | 1 | 1 | 0 | 7228.1038 | 0.0003 |
|---|---|---|---|---|---|-----------|--------|

**Table S20.** Measured frequencies and residuals (in MHz) for the rotational transitions of the  $^{13}\text{C}_8$  isotopologue of cyclooctanone BC1.

| J' | K'_{-1} | K'_{+1} | J'' | K''_{-1} | K''_{+1} | V <sub>obs</sub> | V <sub>obs</sub> - V <sub>calc</sub> |
|----|---------|---------|-----|----------|----------|------------------|--------------------------------------|
| 1  | 0       | 1       | 0   | 0        | 0        | 2829.5957        | -0.0041                              |
| 1  | 1       | 0       | 0   | 0        | 0        | 3565.4285        | -0.0068                              |
| 2  | 1       | 2       | 1   | 1        | 1        | 5138.7917        | -0.0010                              |
| 2  | 0       | 2       | 1   | 0        | 1        | 5299.9788        | 0.0015                               |
| 2  | 1       | 1       | 1   | 1        | 0        | 6179.5981        | 0.0003                               |
| 2  | 1       | 1       | 1   | 0        | 1        | 6915.4364        | 0.0031                               |
| 2  | 2       | 0       | 1   | 1        | 0        | 7185.1084        | -0.0012                              |
| 2  | 2       | 1       | 1   | 1        | 1        | 7346.2995        | 0.0020                               |
| 3  | 1       | 3       | 2   | 1        | 2        | 7525.1693        | 0.0012                               |
| 3  | 0       | 3       | 2   | 0        | 2        | 7570.5441        | -0.0007                              |

**Table S21.** Measured frequencies and residuals (in MHz) for the rotational transitions of the  $^{13}\text{C}_9$  isotopologue of cyclooctanone BC1.

| J' | K'_{-1} | K'_{+1} | J'' | K''_{-1} | K''_{+1} | V <sub>obs</sub> | V <sub>obs</sub> - V <sub>calc</sub> |
|----|---------|---------|-----|----------|----------|------------------|--------------------------------------|
| 1  | 0       | 1       | 0   | 0        | 0        | 2835.1755        | -0.0016                              |
| 2  | 1       | 2       | 1   | 1        | 1        | 5143.8826        | 0.0009                               |
| 2  | 0       | 2       | 1   | 0        | 1        | 5301.9008        | -0.0003                              |
| 2  | 1       | 1       | 1   | 1        | 0        | 6196.8170        | -0.0010                              |
| 2  | 1       | 1       | 1   | 0        | 1        | 6932.1391        | 0.0012                               |
| 2  | 2       | 0       | 1   | 1        | 0        | 7191.8170        | -0.0003                              |
| 2  | 2       | 1       | 1   | 1        | 1        | 7349.8398        | -0.0001                              |
| 3  | 1       | 3       | 2   | 1        | 2        | 7528.3191        | 0.0011                               |
| 3  | 0       | 3       | 2   | 0        | 2        | 7571.1345        | -0.0009                              |

**Table S22.** Measured frequencies and residuals (in MHz) for the rotational transitions of the  $^{13}\text{O}_7$  isotopologue of cyclooctanone BC1.

| J' | K'_{-1} | K'_{+1} | J'' | K''_{-1} | K''_{+1} | V <sub>obs</sub> | V <sub>obs</sub> - V <sub>calc</sub> |
|----|---------|---------|-----|----------|----------|------------------|--------------------------------------|
| 1  | 0       | 1       | 0   | 0        | 0        | 2767.9788        | 0.0134                               |
| 1  | 1       | 0       | 0   | 0        | 0        | 3521.9482        | -0.0057                              |
| 2  | 1       | 2       | 1   | 1        | 1        | 5048.5763        | -0.0015                              |
| 2  | 0       | 2       | 1   | 0        | 1        | 5232.0860        | -0.0012                              |
| 2  | 1       | 1       | 1   | 1        | 0        | 6023.2717        | -0.0035                              |
| 2  | 1       | 1       | 1   | 0        | 1        | 6777.2639        | 0.0002                               |
| 2  | 2       | 0       | 1   | 1        | 0        | 7127.0337        | 0.0046                               |
| 2  | 2       | 1       | 1   | 1        | 1        | 7310.5400        | -0.0017                              |
| 3  | 1       | 3       | 2   | 1        | 2        | 7416.6214        | 0.0005                               |
| 3  | 0       | 3       | 2   | 0        | 2        | 7482.5757        | -0.0010                              |

**Table S23.** Experimental spectroscopic parameters for all singly substituted  $^{13}\text{C}$  and  $^{18}\text{O}$  isotopic species of the BC1 conformer of cyclooctanone.

| Parameter      | $^{13}\text{C}_1$ | $^{13}\text{C}_2$ | $^{13}\text{C}_3$ | $^{13}\text{C}_4$ | $^{13}\text{C}_5$ |
|----------------|-------------------|-------------------|-------------------|-------------------|-------------------|
| A (MHz)        | 1908.60080(73)    | 1899.58571(93)    | 1883.0199(10)     | 1892.69070(73)    | 1902.61094(53)    |
| B (MHz)        | 1673.55905(65)    | 1670.95299(83)    | 1682.14826(91)    | 1674.58818(64)    | 1666.47311(34)    |
| C (MHz)        | 1157.51096(34)    | 1156.96807(43)    | 1152.42858(47)    | 1152.13583(33)    | 1156.13498(17)    |
| $\sigma$ (kHz) | 2.6               | 3.3               | 3.7               | 2.6               | 1.3               |
| N              | 10                | 10                | 10                | 10                | 9                 |

  

| Parameter      | $^{13}\text{C}_6$ | $^{13}\text{C}_7$ | $^{13}\text{C}_8$ | $^{18}\text{O}$ |
|----------------|-------------------|-------------------|-------------------|-----------------|
| A (MHz)        | 1903.6868(13)     | 1890.43352(81)    | 1889.67383(27)    | 1894.2963(14)   |
| B (MHz)        | 1663.15703(81)    | 1675.00266(71)    | 1680.82408(24)    | 1627.6585(13)   |
| C (MHz)        | 1151.05925(41)    | 1154.59819(37)    | 1154.35408(12)    | 1140.30796(67)  |
| $\sigma$ (kHz) | 3.2               | 2.9               | 0.9               | 5.1             |
| N              | 9                 | 10                | 9                 | 10              |

**Table S24.** Measured frequencies and residuals (in MHz) for the rotational transitions of cyclooctanone TBC1.

| J' | $K'_{-1}$ | $K'_{+1}$ | J'' | $K''_{-1}$ | $K''_{+1}$ | $V_{\text{obs}}$ | $V_{\text{obs}} - V_{\text{calc}}$ |
|----|-----------|-----------|-----|------------|------------|------------------|------------------------------------|
| 4  | 2         | 2         | 4   | 2          | 3          | 2594.8198        | -0.0065                            |
| 1  | 0         | 1         | 0   | 0          | 0          | 2724.7589        | -0.0063                            |
| 7  | 4         | 3         | 7   | 4          | 4          | 2792.1636        | -0.0064                            |
| 3  | 1         | 2         | 3   | 1          | 3          | 3105.5121        | -0.0006                            |
| 4  | 4         | 1         | 4   | 3          | 1          | 3328.0771        | 0.0015                             |
| 3  | 3         | 0         | 3   | 2          | 2          | 3410.1156        | 0.0016                             |
| 1  | 1         | 0         | 0   | 0          | 0          | 3617.1094        | -0.0042                            |
| 6  | 3         | 3         | 6   | 3          | 4          | 3631.1505        | -0.0013                            |
| 4  | 4         | 0         | 4   | 3          | 2          | 4110.4209        | -0.0032                            |
| 4  | 3         | 2         | 4   | 1          | 3          | 4123.5168        | -0.0069                            |
| 2  | 0         | 2         | 1   | 1          | 0          | 4244.2377        | -0.0045                            |
| 5  | 2         | 3         | 5   | 2          | 4          | 4283.3386        | -0.0024                            |
| 4  | 1         | 3         | 4   | 1          | 4          | 4673.0759        | 0.0020                             |
| 8  | 4         | 4         | 8   | 4          | 5          | 4726.6660        | 0.0012                             |
| 2  | 0         | 2         | 1   | 1          | 1          | 4784.7981        | 0.0089                             |
| 2  | 1         | 2         | 1   | 1          | 1          | 4908.9797        | 0.0000                             |
| 5  | 3         | 3         | 5   | 1          | 4          | 4974.8132        | 0.0044                             |
| 5  | 5         | 0         | 5   | 4          | 2          | 5016.1214        | 0.0001                             |
| 2  | 0         | 2         | 1   | 0          | 1          | 5136.5888        | -0.0019                            |
| 2  | 1         | 2         | 1   | 0          | 1          | 5260.7903        | 0.0091                             |
| 7  | 3         | 4         | 7   | 3          | 5          | 5478.1190        | 0.0108                             |
| 3  | 0         | 3         | 2   | 1          | 1          | 5550.1844        | -0.0112                            |
| 6  | 2         | 4         | 6   | 2          | 5          | 5930.6433        | -0.0021                            |
| 2  | 1         | 1         | 1   | 1          | 0          | 5990.0618        | -0.0023                            |
| 5  | 1         | 4         | 5   | 1          | 5          | 6149.2532        | 0.0019                             |
| 6  | 3         | 4         | 6   | 1          | 5          | 6162.8940        | 0.0046                             |
| 9  | 4         | 5         | 9   | 4          | 6          | 6688.0565        | 0.0020                             |
| 2  | 1         | 1         | 1   | 0          | 1          | 6882.4112        | -0.0013                            |
| 3  | 0         | 3         | 2   | 1          | 2          | 7171.8366        | 0.0097                             |

|   |   |   |   |   |   |           |         |
|---|---|---|---|---|---|-----------|---------|
| 8 | 3 | 5 | 8 | 3 | 6 | 7179.6412 | -0.0059 |
| 3 | 1 | 3 | 2 | 1 | 2 | 7201.3659 | 0.0068  |
| 3 | 0 | 3 | 2 | 0 | 2 | 7296.0254 | 0.0080  |
| 3 | 1 | 3 | 2 | 0 | 2 | 7325.5343 | -0.0154 |
| 2 | 2 | 0 | 1 | 1 | 0 | 7358.3881 | 0.0002  |
| 7 | 2 | 5 | 7 | 2 | 6 | 7436.6744 | -0.0030 |
| 6 | 1 | 5 | 6 | 1 | 6 | 7566.6001 | -0.0003 |
| 2 | 2 | 1 | 1 | 1 | 1 | 7586.0130 | 0.0002  |

**Table S25.** Measured frequencies and residuals (in MHz) for the rotational transitions of cyclooctanone BC2.

| J' | K' <sub>-1</sub> | K' <sub>+1</sub> | J'' | K'' <sub>-1</sub> | K'' <sub>+1</sub> | V <sub>obs</sub> | V <sub>obs</sub> - V <sub>calc</sub> |
|----|------------------|------------------|-----|-------------------|-------------------|------------------|--------------------------------------|
| 1  | 0                | 1                | 0   | 0                 | 0                 | 2753.8306        | 0.0036                               |
| 3  | 1                | 2                | 3   | 1                 | 3                 | 3022.2846        | -0.0029                              |
| 3  | 2                | 2                | 3   | 0                 | 3                 | 3706.0092        | -0.0007                              |
| 4  | 2                | 3                | 4   | 0                 | 4                 | 4851.3487        | 0.0001                               |
| 2  | 1                | 2                | 1   | 1                 | 1                 | 4984.7597        | -0.0003                              |
| 2  | 0                | 2                | 1   | 0                 | 1                 | 5223.2149        | -0.0021                              |
| 2  | 1                | 2                | 1   | 0                 | 1                 | 5373.1467        | -0.0014                              |
| 2  | 1                | 1                | 1   | 1                 | 0                 | 6030.5536        | 0.0007                               |
| 3  | 1                | 3                | 2   | 1                 | 2                 | 7328.8701        | -0.0138                              |
| 3  | 0                | 3                | 2   | 0                 | 2                 | 7439.2517        | -0.0137                              |
| 3  | 1                | 3                | 2   | 0                 | 2                 | 7478.8012        | -0.0137                              |
| 2  | 2                | 0                | 1   | 1                 | 0                 | 7480.1497        | -0.0068                              |
| 2  | 2                | 1                | 1   | 1                 | 1                 | 7718.6153        | 0.0018                               |

**Table S26.** Substitution coordinates of the heavy atoms of cyclooctanone BC1.

|                | <i>a</i>     | <i>b</i>     | <i>c</i>    |
|----------------|--------------|--------------|-------------|
| C <sub>1</sub> | -1.85974(81) | -0.9109(17)  | -0.2614(58) |
| C <sub>2</sub> | -1.4720(10)  | 0.4191(36)   | -0.9043(17) |
| C <sub>3</sub> | -1.1883(13)  | 1.57034(96)  | 0.075(20)   |
| C <sub>4</sub> | 0.2775(54)   | 1.92021(78)  | 0.2661(56)  |
| C <sub>5</sub> | 1.1736(13)   | 0.8064(19)   | 0.8824(17)  |
| C <sub>6</sub> | 1.3014(12)   | -0.3715(40)  | -0.062(24)  |
| O <sub>7</sub> | 2.02753(74)  | -0.3199(47)  | -1.0233(15) |
| C <sub>8</sub> | -0.8901(17)  | -1.4608(10)  | 0.7812(19)  |
| C <sub>9</sub> | 0.5368(28)   | -1.65569(91) | 0.2869(53)  |
